# Supplementary material for: Establishment of a Conditionally Immortalized Wilms Tumor Cell Line with a Homozygous WT1 Deletion within a Heterozygous 11p13 Deletion and UPD Limited to 11p15
Source: PLOS journal article supplement (doi:10.1371/journal.pone.0155561), 2016-05-23
Supplement: S4 (10.1371/journal.pone.0155561.s004) [file journal.pone.0155561.s004]

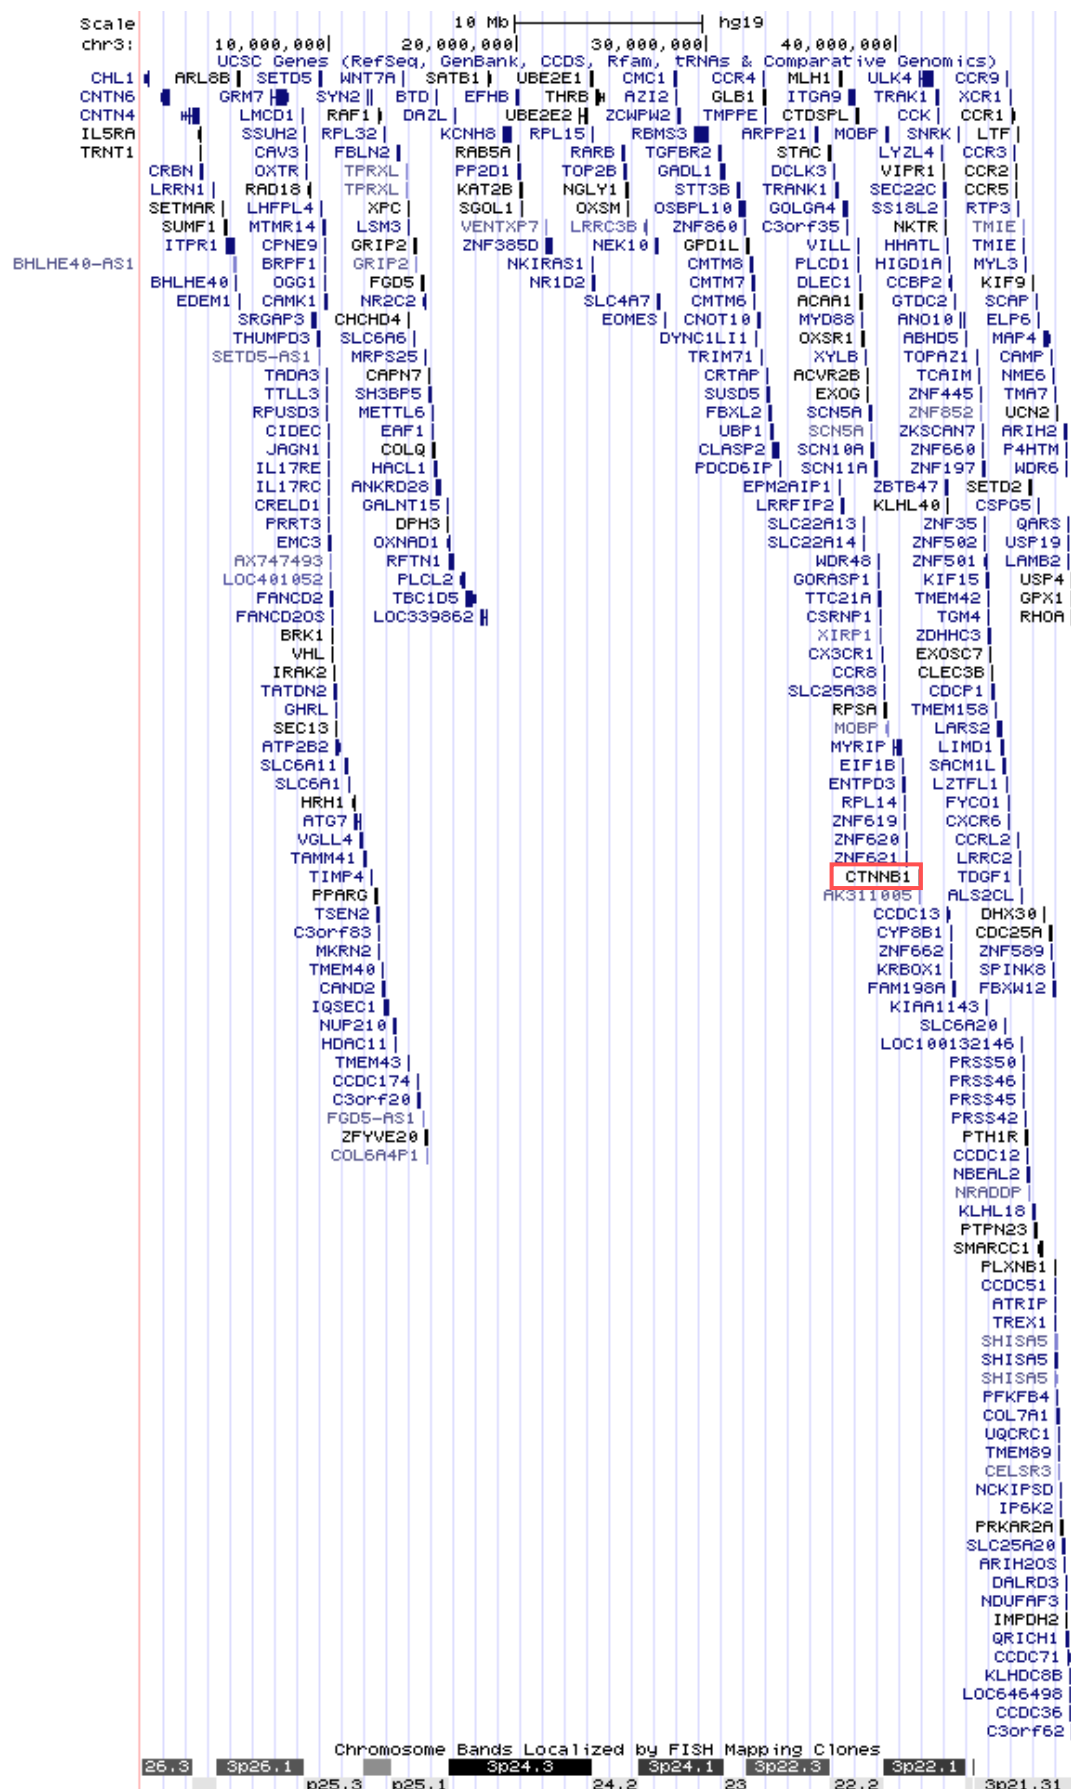

**Figure S4. The terminal 3p21pter UPD.**

The position of the *CTNNB1* gene is labelled with a red box.
