# Supplementary material for: Establishment of a Conditionally Immortalized Wilms Tumor Cell Line with a Homozygous WT1 Deletion within a Heterozygous 11p13 Deletion and UPD Limited to 11p15
Source: PLOS journal article supplement (doi:10.1371/journal.pone.0155561), 2016-05-23
Supplement: S8 (10.1371/journal.pone.0155561.s008) [file journal.pone.0155561.s008]

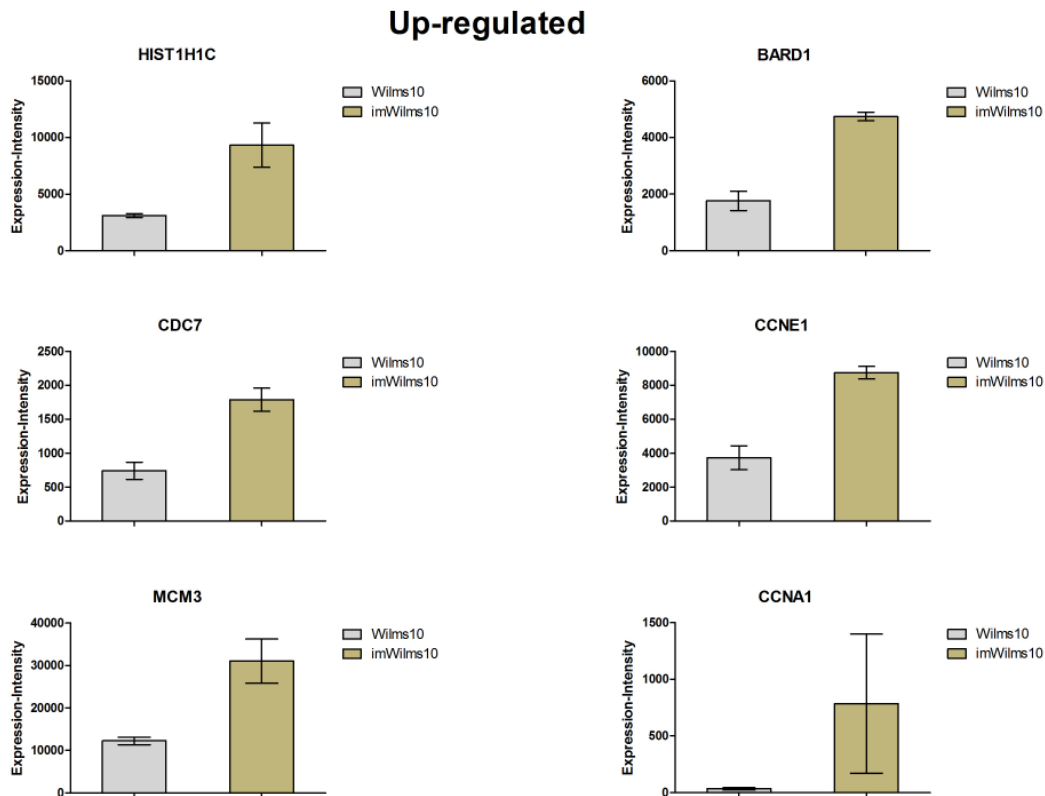

**Figure S8. Comparison of the expression of up-regulated genes in the imWilm10 cells**

This Figure shows the expression by intensity from the Agilent arrays of selected genes involved in cell cycle regulation. Error bar corresponds to standard error.
